# Supplementary material for: A mechanistic study of the addition of alcohol to a five-membered ring silene via a photochemical reaction
Source: Royal Society of Chemistry journal article supplement (doi:10.1039/c5cp06857f), 2016-01-01
Supplement: c5cp06857f1.pdf [file c5cp06857f1.pdf]

# Supplementary Materials

## A Mechanistic Study of the Addition of Alcohol to a Five-Membered Ring Silene via a Photochemical Reaction

Ming-Der Su<sup>1,2\*</sup>

<sup>1</sup>Department of Applied Chemistry, National Chiayi University, Chiayi 60004,  
Taiwan

<sup>2</sup>Department of Medicinal and Applied Chemistry, Kaohsiung Medical  
University, Kaohsiung 80708, Taiwan

\*E-mail: [midesu@mail.ncyu.edu.tw](mailto:midesu@mail.ncyu.edu.tw)

The fixed geometrical parameters are shown below:

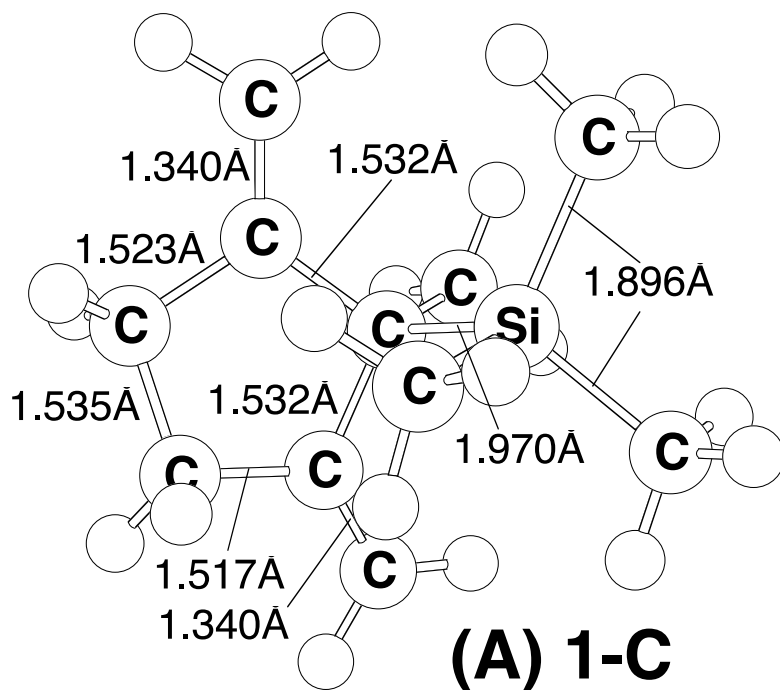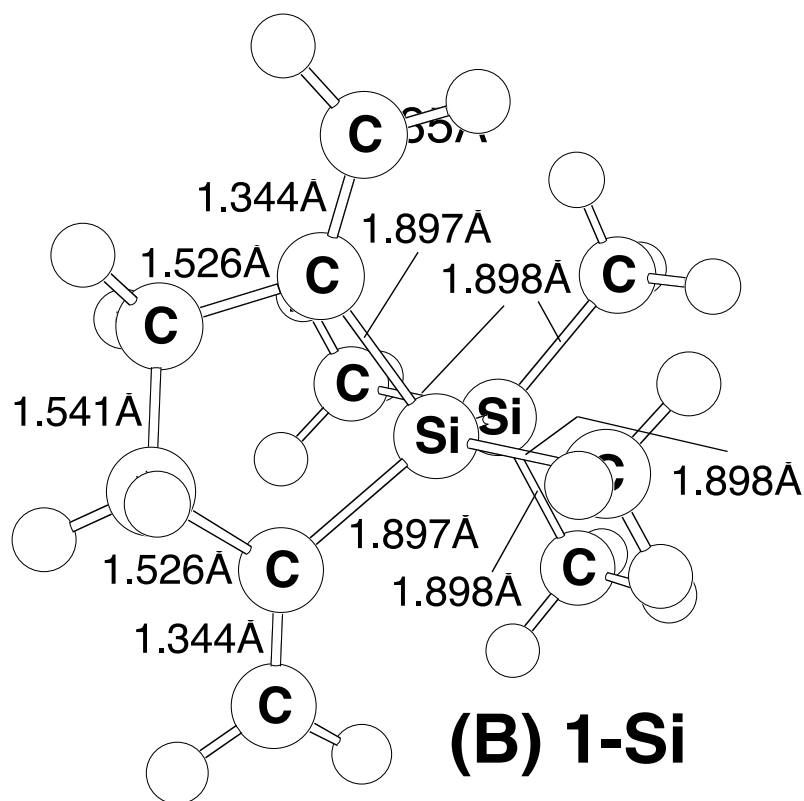

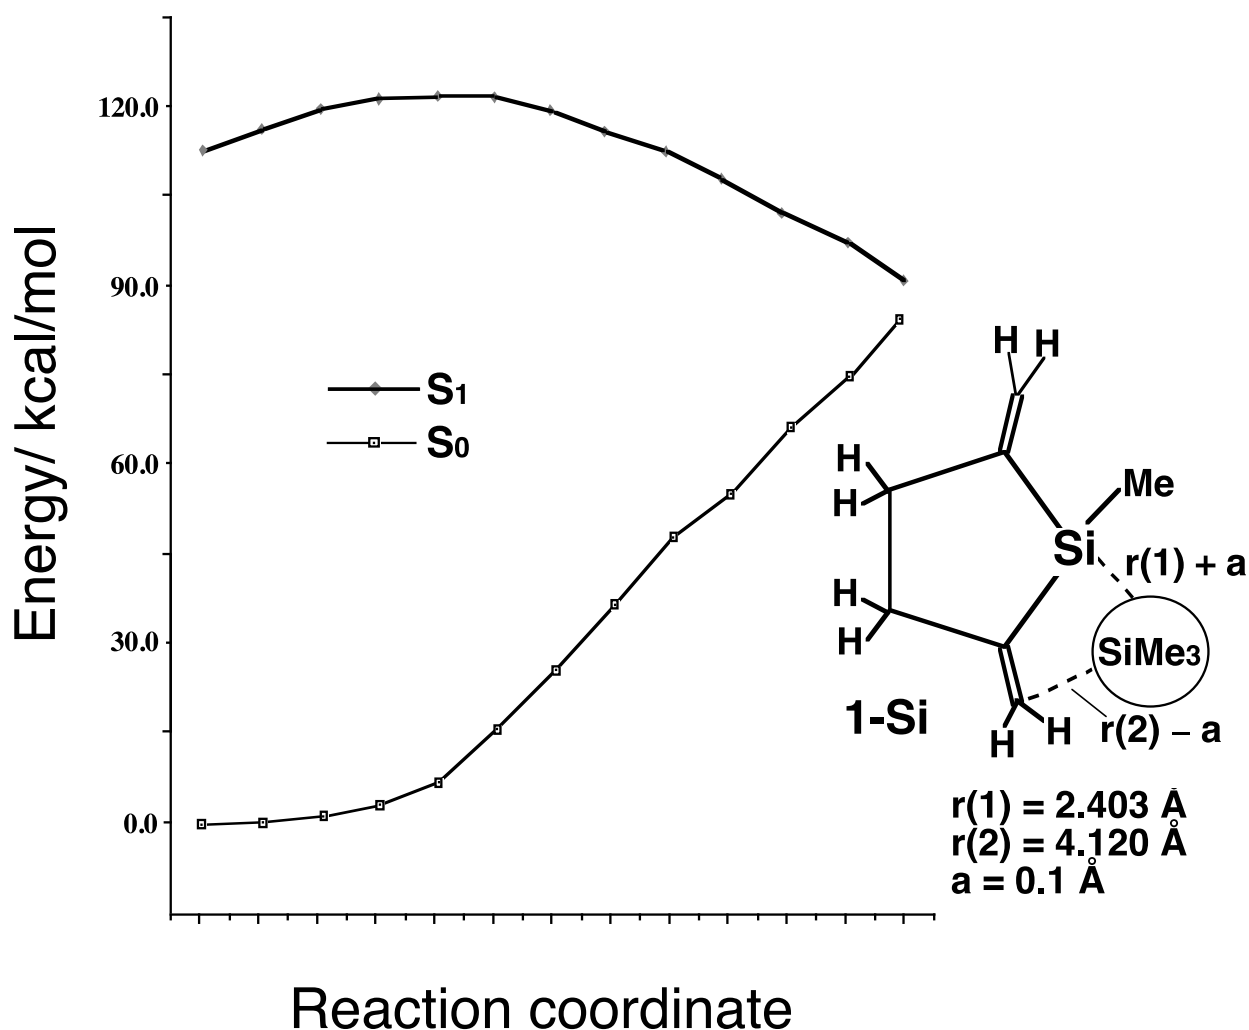

Figure SA: The behavior of the ground-state (starting from reactant, **1-Si**, CAS(6,6)/6-311G(d)) and lowest energy singlet state (starting from the FC point at the  $S_1$  state, CAS(6,6)/6-311G(d)) along the reaction coordinate towards the conical intersection point ( $S_0/S_1$ -CI-Si). From this scan, it is apparent to see that stretching the  $r(1)$  coordinate on the  $S_1$  surface and a steepest ascent reaction path toward  $S_0/S_1$ -CI-Si. Moreover, both curves stop at an abrupt conical intersection. The reason for this is because the force constant is not real zero at the conical intersection point, since the conical intersection point is not a true minimum at the excited state surface. For details, interesting readers can find in ref. (8).

(1) 1-C

---

| Atomic<br>Number | Coordinates (Angstroms) |           |           |
|------------------|-------------------------|-----------|-----------|
|                  | X                       | Y         | Z         |
| 1                | -3.068472               | 1.236522  | 1.121254  |
| 6                | -2.128325               | 0.680407  | 1.044869  |
| 1                | -1.607348               | 0.762584  | 2.004770  |
| 6                | -1.241191               | 1.176702  | -0.067276 |
| 6                | -2.384882               | -0.784551 | 0.706173  |
| 1                | -2.485036               | -1.384670 | 1.616431  |
| 1                | -3.310828               | -0.873944 | 0.125056  |
| 6                | -1.216542               | -1.222846 | -0.143385 |
| 6                | -0.428552               | 0.000863  | -0.619374 |
| 6                | -0.255289               | 0.030364  | -2.153426 |
| 1                | 0.310193                | 0.907593  | -2.486918 |
| 1                | -1.229156               | 0.053779  | -2.657358 |
| 1                | 0.280682                | -0.851641 | -2.521700 |
| 14               | 1.452971                | 0.027490  | 0.286223  |
| 6                | 2.272223                | 1.664804  | -0.135557 |
| 1                | 3.286713                | 1.698437  | 0.272885  |
| 1                | 1.710232                | 2.503327  | 0.285058  |
| 1                | 2.336705                | 1.800281  | -1.218897 |
| 6                | 2.470036                | -1.391723 | -0.402712 |
| 1                | 3.492570                | -1.347285 | -0.015521 |
| 1                | 2.519390                | -1.344887 | -1.494181 |
| 1                | 2.044885                | -2.357076 | -0.115597 |
| 6                | 1.247135                | -0.150286 | 2.139741  |
| 1                | 2.224340                | -0.232670 | 2.625198  |
| 1                | 0.669825                | -1.045712 | 2.387272  |
| 1                | 0.735755                | 0.718904  | 2.562511  |
| 6                | -1.295075               | 2.429667  | -0.542878 |
| 1                | -1.953642               | 3.170630  | -0.099386 |
| 1                | -0.684933               | 2.754695  | -1.378956 |
| 6                | -1.002063               | -2.508017 | -0.462756 |
| 1                | -1.651608               | -3.294160 | -0.089014 |
| 1                | -0.186716               | -2.811857 | -1.110534 |

---

CASSCF(6,6)/6-311G(d) = -717.1565338385

MP2(6,6)/6-311++G(3df,3pd)//CASSCF(6,6)/6-311G(d) = -719.472515

## (2) FC-C

CASSCF(6,6)/6-311G(d) = -716.988897098

MP2(6,6)/6-311++G(3df,3pd)//CASSCF(6,6)/6-311G(d) = -719.3281791

## (3) S1/S0-CI-C

---

| Atomic<br>Number | Coordinates (Angstroms) |           |           |
|------------------|-------------------------|-----------|-----------|
|                  | X                       | Y         | Z         |
| 6                | 0.297175                | 0.004719  | -0.005226 |
| 6                | 0.708668                | -0.400186 | 1.710245  |
| 6                | 2.227736                | -0.251167 | 1.795679  |
| 6                | 2.749600                | -0.136870 | 0.358379  |
| 6                | 1.614118                | 0.466662  | -0.439480 |
| 1                | 3.644528                | 0.471315  | 0.300102  |
| 1                | 3.004397                | -1.114806 | -0.033507 |
| 1                | 2.464801                | 0.656638  | 2.344226  |
| 1                | 2.682554                | -1.076909 | 2.334273  |
| 14               | 0.030156                | -2.084810 | 0.926746  |
| 6                | 1.074126                | -3.008902 | -0.355011 |
| 1                | 2.073657                | -3.229154 | 0.009499  |
| 1                | 1.156218                | -2.500152 | -1.307190 |
| 1                | 0.592241                | -3.970618 | -0.525921 |
| 6                | 0.181547                | -3.225375 | 2.468178  |
| 1                | -0.456766               | -2.883879 | 3.280877  |
| 1                | 1.199209                | -3.260357 | 2.853045  |
| 1                | -0.106645               | -4.249359 | 2.234907  |
| 6                | -1.818405               | -2.155946 | 0.521959  |
| 1                | -2.433719               | -1.615237 | 1.236347  |
| 1                | -2.129395               | -3.197361 | 0.571114  |
| 1                | -2.048779               | -1.784148 | -0.469521 |
| 6                | -0.887039               | 0.924800  | -0.158186 |
| 1                | -0.689230               | 1.931167  | 0.210752  |
| 1                | -1.775606               | 0.552556  | 0.332075  |
| 1                | -1.128151               | 1.002279  | -1.215181 |
| 6                | -0.069619               | 0.198878  | 2.690217  |
| 1                | 0.371769                | 0.731040  | 3.516451  |
| 1                | -1.143216               | 0.174229  | 2.663270  |
| 6                | 1.819968                | 1.345956  | -1.447515 |
| 1                | 1.013143                | 1.775505  | -2.012075 |

---

## Derivative Coupling

|     |               |               |               |
|-----|---------------|---------------|---------------|
| -1  | -0.0217420798 | -0.0539829755 | -0.0318060066 |
| -2  | -0.0037651738 | 0.0530440494  | 0.0656320669  |
| -3  | 0.0030803587  | -0.0015339996 | 0.0036029117  |
| -4  | -0.0005236623 | 0.0002077465  | -0.0020608756 |
| -5  | 0.0039383927  | 0.0081234476  | 0.0093907307  |
| -6  | -0.0001853401 | -0.0000122701 | 0.0006576914  |
| -7  | -0.0002455116 | -0.0000491623 | 0.0003483027  |
| -8  | -0.0003430563 | -0.0009266806 | 0.0000807948  |
| -9  | -0.0002221952 | -0.0003024288 | 0.0002131613  |
| -10 | -0.0124392384 | 0.0129333270  | -0.0487260268 |
| -11 | 0.0012015744  | -0.0034031370 | 0.0033415036  |
| -12 | 0.0007914605  | -0.0011721619 | -0.0005831123 |
| -13 | -0.0011619950 | 0.0011070981  | 0.0020093059  |
| -14 | 0.0005980443  | -0.0011670252 | 0.0001661638  |
| -15 | 0.0039458654  | 0.0067172461  | 0.0048569859  |
| -16 | -0.0000848718 | -0.0003830423 | 0.0003352702  |
| -17 | -0.0001745385 | -0.0008105658 | 0.0008016766  |
| -18 | 0.0000797424  | 0.0017482022  | -0.0026342538 |
| -19 | -0.0004373297 | -0.0032134053 | 0.0035489181  |
| -20 | -0.0010587744 | -0.0001514150 | 0.0000723093  |
| -21 | -0.0013284839 | -0.0003637633 | 0.0006071214  |
| -22 | 0.0021017518  | 0.0002481944  | 0.0008805386  |
| -23 | 0.0054616351  | 0.0053480221  | 0.0140507493  |
| -24 | -0.0028397679 | 0.0041143997  | -0.0003471479 |
| -25 | -0.0009726367 | -0.0000926857 | -0.0010746468 |
| -26 | 0.0023573919  | -0.0026851471 | 0.0003907092  |
| -27 | 0.0255392432  | -0.0202454554 | -0.0292010819 |
| -28 | -0.0001188732 | -0.0014051659 | 0.0024549757  |
| -29 | -0.0003715904 | 0.0007684291  | -0.0015482995 |
| -30 | -0.0013659107 | -0.0007430655 | 0.0052878431  |
| -31 | 0.0000539525  | 0.0004661178  | 0.0002997185  |
| -32 | 0.0002316171  | -0.0021827277 | -0.0010479976 |

## Unscaled Gradient Difference

|     |               |               |               |
|-----|---------------|---------------|---------------|
| -1  | -0.0172088328 | -0.0012100563 | -0.0939510934 |
| -2  | -0.0038409218 | -0.1072592944 | 0.0949872310  |
| -3  | -0.0019990022 | 0.0106736328  | 0.0000099847  |
| -4  | -0.0000584801 | -0.0012867054 | 0.0006810040  |
| -5  | -0.0199067249 | 0.0179765704  | 0.0200213745  |
| -6  | -0.0001305747 | 0.0004804434  | 0.0000118315  |
| -7  | -0.0000729987 | 0.0001492914  | -0.0000066556 |
| -8  | 0.0031060595  | 0.0014658401  | 0.0002735117  |
| -9  | -0.0030271400 | -0.0007105967 | -0.0007963628 |
| -10 | 0.0136998453  | 0.0389881956  | 0.0244411515  |
| -11 | 0.0034352965  | 0.0064018871  | -0.0004519810 |
| -12 | -0.0002476312 | -0.0002818674 | 0.0000687866  |
| -13 | 0.0001562122  | -0.0006145418 | -0.0006531508 |
| -14 | -0.0014149817 | 0.0012024873  | 0.0012600908  |

|     |               |               |               |
|-----|---------------|---------------|---------------|
| -15 | -0.0045263993 | -0.0086835162 | -0.0039564464 |
| -16 | -0.0002911067 | -0.0003463017 | 0.0006663375  |
| -17 | 0.0006444761  | 0.0003525096  | -0.0000831453 |
| -18 | 0.0000832273  | -0.0024467882 | 0.0035158748  |
| -19 | 0.0013224317  | 0.0031222185  | -0.0000930540 |
| -20 | -0.0002267120 | -0.0002063874 | 0.0001431492  |
| -21 | 0.0008520047  | -0.0001019903 | 0.0000868982  |
| -22 | -0.0004455804 | 0.0000731966  | -0.0003070100 |
| -23 | 0.0113873176  | 0.0225444356  | 0.0044189621  |
| -24 | -0.0066309068 | 0.0024114491  | -0.0062688329 |
| -25 | 0.0005350882  | -0.0019462732 | 0.0003814413  |
| -26 | 0.0030638410  | -0.0020384366 | -0.0010256411 |
| -27 | 0.0188114176  | 0.0053089812  | -0.0289818053 |
| -28 | -0.0003958307 | 0.0167093081  | -0.0079651209 |
| -29 | -0.0003541498 | -0.0076320964 | 0.0048228388  |
| -30 | 0.0037260540  | 0.0097622782  | -0.0074980473 |
| -31 | -0.0000219871 | 0.0020622520  | 0.0019561724  |
| -32 | -0.0000233107 | -0.0049201250 | -0.0057082940 |

-----

CASSCF(6,6)/6-311G(d) = -716.9878509272

MP2(6,6)/6-311++G(3df,3pd)//CASSCF(6,6)/6-311G(d) = -719.3198029

#### (4) Int-C

| Atomic<br>Number | Coordinates (Angstroms) |           |           |
|------------------|-------------------------|-----------|-----------|
|                  | X                       | Y         | Z         |
| 6                | -2.911044               | 0.015129  | -0.075642 |
| 1                | -3.624368               | -0.065201 | -0.905601 |
| 6                | -2.443557               | -1.498583 | 0.193127  |
| 1                | -3.230721               | -2.199644 | -0.104577 |
| 1                | -2.220724               | -1.654870 | 1.257794  |
| 6                | -1.176125               | -1.675447 | -0.627069 |
| 1                | -1.402509               | -2.062095 | -1.626361 |
| 1                | -0.485712               | -2.362218 | -0.131460 |
| 6                | -0.655309               | -0.273484 | -0.729634 |
| 6                | -1.589712               | 0.646999  | -0.427743 |
| 6                | -1.474278               | 2.135274  | -0.518284 |
| 1                | -2.295205               | 2.535347  | -1.121607 |
| 1                | -0.538036               | 2.461908  | -0.977023 |
| 1                | -1.529405               | 2.582167  | 0.478945  |
| 6                | 0.743242                | -0.043313 | -1.222649 |
| 1                | 0.804193                | 0.897178  | -1.780953 |
| 1                | 1.006993                | -0.828313 | -1.941909 |

|    |           |           |           |
|----|-----------|-----------|-----------|
| 14 | 2.088079  | 0.002418  | 0.130687  |
| 6  | 3.748984  | 0.307824  | -0.697337 |
| 1  | 3.738280  | 1.256532  | -1.241930 |
| 1  | 3.978196  | -0.493405 | -1.406010 |
| 1  | 4.548789  | 0.347639  | 0.047944  |
| 6  | 2.150588  | -1.625650 | 1.055563  |
| 1  | 2.287734  | -2.460519 | 0.362038  |
| 1  | 1.225956  | -1.792068 | 1.615867  |
| 1  | 2.982211  | -1.632568 | 1.766538  |
| 6  | 1.732707  | 1.399602  | 1.332235  |
| 1  | 1.673079  | 2.356408  | 0.805234  |
| 1  | 2.524943  | 1.471472  | 2.083311  |
| 1  | 0.784578  | 1.233956  | 1.852164  |
| 6  | -3.467175 | 0.464869  | 1.060183  |
| 1  | -4.546306 | 0.448554  | 1.183051  |
| 1  | -2.865006 | 0.806568  | 1.898423  |

-----  
 CASSCF(6,6, + 6,4)/6-311G(d) = -717.17768504

MP2(6,6, + 6,4)/6-311++G(3df,3pd)//CASSCF(6,6, + 6,4)/6-311G(d)= -719.452360622

### (5) CH<sub>3</sub>OH

| Atomic<br>Number | Coordinates (Angstroms) |           |          |
|------------------|-------------------------|-----------|----------|
|                  | X                       | Y         | Z        |
| 8                | 0.000000                | 0.000000  | 2.000000 |
| 6                | 1.385642                | 0.000000  | 2.210512 |
| 1                | -0.455560               | 0.000000  | 2.826900 |
| 1                | 1.647942                | 0.000000  | 3.287333 |
| 1                | 1.827084                | 0.881563  | 1.759173 |
| 1                | 1.827084                | -0.881563 | 1.759173 |

-----  
 CASSCF(6,4)/6-311G(d) = -115.0498058

MP2(6,4)/6-311++G(3df,3pd)//CASSCF(6,4)/6-311G(d)= -115.4382962

### (6) Cpx-C

| Atomic<br>Number | Coordinates (Angstroms) |           |          |
|------------------|-------------------------|-----------|----------|
|                  | X                       | Y         | Z        |
| 1                | 2.880600                | -1.298637 | 2.147573 |
| 6                | 2.412692                | -0.491394 | 1.596230 |



|    |           |           |           |
|----|-----------|-----------|-----------|
| 1  | 2.876827  | 0.441831  | 1.884925  |
| 6  | 0.878375  | -0.494481 | 1.839419  |
| 1  | 0.505269  | 0.515919  | 1.945300  |
| 1  | 0.601169  | -1.062763 | 2.718994  |
| 6  | 0.308014  | -1.125605 | 0.571614  |
| 6  | 2.553641  | -0.768028 | 0.100270  |
| 6  | 1.241184  | -1.271949 | -0.369427 |
| 6  | -1.155659 | -1.452585 | 0.491991  |
| 1  | -1.496498 | -1.811449 | 1.462934  |
| 1  | -1.327256 | -2.261815 | -0.214546 |
| 6  | 1.079585  | -1.829278 | -1.758294 |
| 1  | 1.816167  | -2.605868 | -1.938879 |
| 1  | 1.223704  | -1.054976 | -2.507415 |
| 1  | 0.095669  | -2.253050 | -1.905060 |
| 14 | -2.290572 | -0.000269 | -0.025545 |
| 6  | -4.050133 | -0.696228 | -0.045554 |
| 1  | -4.344259 | -1.063022 | 0.936142  |
| 1  | -4.146391 | -1.520920 | -0.749294 |
| 1  | -4.766397 | 0.069455  | -0.337558 |
| 6  | -1.816796 | 0.622507  | -1.738086 |
| 1  | -2.565602 | 1.319223  | -2.112029 |
| 1  | -1.725490 | -0.182190 | -2.464069 |
| 1  | -0.872173 | 1.153223  | -1.676206 |
| 6  | -2.175612 | 1.425343  | 1.198973  |
| 1  | -2.971763 | 2.146605  | 1.020395  |
| 1  | -1.226525 | 1.935884  | 1.068633  |
| 1  | -2.260034 | 1.093452  | 2.231882  |
| 1  | 1.988182  | 3.229655  | -1.543075 |
| 6  | 1.688432  | 3.198273  | -0.501858 |
| 1  | 1.085081  | 4.066024  | -0.287141 |
| 1  | 2.576648  | 3.226641  | 0.118986  |
| 8  | 0.869960  | 2.045867  | -0.213140 |
| 1  | 1.354318  | 1.226614  | -0.377771 |
| 6  | 3.636439  | -0.566264 | -0.631672 |
| 1  | 4.540826  | -0.178171 | -0.202123 |
| 1  | 3.665281  | -0.796707 | -1.679483 |

---

(7) Cis-TS-C

---

| Atomic<br>Number | Coordinates (Angstroms) |           |           |
|------------------|-------------------------|-----------|-----------|
|                  | X                       | Y         | Z         |
| 1                | 2.361594                | -2.920997 | -0.701692 |
| 6                | 1.900967                | -2.187812 | -0.032792 |
| 1                | 1.814753                | -2.628579 | 0.966971  |
| 6                | 0.529320                | -1.760188 | -0.529944 |
| 1                | -0.240983               | -2.407578 | -0.099580 |
| 1                | 0.474662                | -1.884935 | -1.618853 |
| 6                | 2.657640                | -0.901259 | 0.054614  |
| 6                | 1.708786                | 0.236440  | 0.327146  |
| 6                | 0.340383                | -0.261739 | -0.206806 |
| 6                | -0.813537               | -0.069054 | 0.800874  |
| 1                | -0.730167               | 0.900352  | 1.300634  |
| 1                | -0.804509               | -0.841854 | 1.577795  |
| 6                | 1.861558                | 0.843041  | 1.707895  |
| 8                | 2.041063                | 1.428216  | -0.918988 |
| 6                | 1.683095                | 2.684047  | -0.568105 |
| 1                | 2.384017                | 3.078556  | 0.170724  |
| 1                | 0.659898                | 2.703858  | -0.186564 |
| 1                | 1.730715                | 3.311637  | -1.462095 |
| 1                | 1.646110                | 0.101676  | 2.485581  |
| 1                | 2.884322                | 1.202141  | 1.870944  |
| 1                | 1.200869                | 1.698007  | 1.875497  |
| 14               | -2.595171               | -0.012536 | 0.025142  |
| 6                | -3.813678               | 0.453974  | 1.371812  |
| 1                | -4.829132               | 0.515922  | 0.969497  |
| 1                | -3.557349               | 1.425129  | 1.805440  |
| 1                | -3.807431               | -0.291025 | 2.172930  |
| 6                | -2.592020               | 1.301991  | -1.319106 |
| 1                | -3.587217               | 1.400589  | -1.762404 |
| 1                | -1.886634               | 1.040404  | -2.113303 |
| 1                | -2.300854               | 2.272587  | -0.906825 |
| 6                | -3.047904               | -1.672986 | -0.704912 |
| 1                | -4.073451               | -1.660175 | -1.086101 |
| 1                | -2.975883               | -2.461953 | 0.049556  |
| 1                | -2.383487               | -1.930807 | -1.534721 |
| 6                | 3.983123                | -0.806338 | -0.114753 |
| 1                | 4.518458                | 0.131040  | -0.017729 |
| 1                | 4.578813                | -1.695420 | -0.305841 |

1 0.540363 0.530491 -1.165476

---

**(8) Tran-TS-C**

---

| Atomic<br>Number | Coordinates (Angstroms) |           |           |
|------------------|-------------------------|-----------|-----------|
|                  | X                       | Y         | Z         |
| 1                | -2.295743               | -2.190531 | -1.500140 |
| 6                | -1.788851               | -1.970135 | -0.555453 |
| 1                | -1.696732               | -2.895747 | 0.023961  |
| 6                | -2.521509               | -0.924655 | 0.244086  |
| 6                | -0.407264               | -1.371236 | -0.811473 |
| 6                | -0.229639               | -0.304530 | 0.276273  |
| 6                | -1.648073               | 0.295268  | 0.400348  |
| 6                | -1.844257               | 1.236437  | 1.580614  |
| 1                | -2.887132               | 1.553584  | 1.680311  |
| 1                | -1.255131               | 2.150825  | 1.459403  |
| 1                | -1.555850               | 0.755028  | 2.520749  |
| 8                | -1.835134               | 1.208247  | -1.063115 |
| 6                | -3.097871               | 1.860683  | -1.078379 |
| 1                | -3.135807               | 2.644174  | -0.318441 |
| 1                | -3.915736               | 1.150546  | -0.943431 |
| 1                | -3.217978               | 2.336322  | -2.055773 |
| 6                | -3.716057               | -1.148970 | 0.810488  |
| 1                | -4.212430               | -0.404489 | 1.423483  |
| 1                | -4.235379               | -2.091691 | 0.663947  |
| 1                | 0.363133                | -2.146068 | -0.760786 |
| 1                | -0.368794               | -0.926931 | -1.813665 |
| 14               | 2.688440                | 0.086247  | 0.033288  |
| 6                | 3.098326                | -0.830387 | -1.549082 |
| 1                | 2.865037                | -0.215043 | -2.423062 |
| 1                | 2.533443                | -1.762916 | -1.626216 |
| 1                | 4.163398                | -1.079058 | -1.582499 |
| 6                | 2.959502                | -1.031471 | 1.511460  |
| 1                | 2.679734                | -0.522582 | 2.438622  |
| 1                | 4.011393                | -1.323039 | 1.586364  |
| 1                | 2.361020                | -1.943221 | 1.426281  |
| 6                | 3.821938                | 1.583347  | 0.176064  |
| 1                | 3.679540                | 2.254789  | -0.675738 |

|   |          |           |           |
|---|----------|-----------|-----------|
| 1 | 4.869987 | 1.270616  | 0.197653  |
| 1 | 3.609061 | 2.139847  | 1.093496  |
| 1 | 0.047008 | -0.964712 | 1.474791  |
| 1 | 0.837590 | 1.507824  | 0.744310  |
| 6 | 0.885011 | 0.712131  | -0.007176 |
| 1 | 0.731733 | 1.190142  | -0.981352 |

---

**(9) Cis-Pro-C**

---

| Atomic<br>Number | Coordinates (Angstroms) |           |           |
|------------------|-------------------------|-----------|-----------|
|                  | X                       | Y         | Z         |
| 1                | -1.952131               | 2.399261  | -1.071430 |
| 6                | -1.248102               | 1.853277  | -0.455749 |
| 1                | -0.621448               | 2.571984  | 0.058708  |
| 6                | -0.396043               | 0.866632  | -1.305090 |
| 1                | 0.562941                | 1.284247  | -1.572251 |
| 1                | -0.932517               | 0.606794  | -2.203886 |
| 6                | -1.973252               | 0.969786  | 0.558616  |
| 6                | -1.696583               | -0.480862 | 0.185422  |
| 6                | -0.273492               | -0.401015 | -0.421821 |
| 1                | -0.114623               | -1.283393 | -1.026400 |
| 6                | 0.828199                | -0.272810 | 0.656507  |
| 1                | 0.801859                | -1.159436 | 1.288492  |
| 1                | 0.597347                | 0.568148  | 1.310410  |
| 6                | -1.889061               | -1.505862 | 1.297315  |
| 8                | -2.498053               | -0.830913 | -0.978024 |
| 6                | -3.928242               | -0.823889 | -0.855243 |
| 1                | -4.291669               | 0.112141  | -0.451530 |
| 1                | -4.284484               | -1.636911 | -0.234395 |
| 1                | -4.313453               | -0.955646 | -1.855794 |
| 1                | -1.265975               | -1.274557 | 2.148455  |
| 1                | -2.918757               | -1.529473 | 1.632498  |
| 1                | -1.635168               | -2.490649 | 0.922971  |
| 14               | 2.625053                | -0.110826 | 0.055388  |
| 6                | 3.740634                | -0.852944 | 1.390940  |
| 1                | 4.791417                | -0.759640 | 1.123665  |
| 1                | 3.531086                | -1.910600 | 1.539107  |
| 1                | 3.599591                | -0.352274 | 2.347246  |

|   |           |           |           |
|---|-----------|-----------|-----------|
| 6 | 2.887005  | -1.055107 | -1.559344 |
| 1 | 3.932491  | -1.020635 | -1.860180 |
| 1 | 2.296860  | -0.640290 | -2.373129 |
| 1 | 2.610931  | -2.102554 | -1.453606 |
| 6 | 3.131634  | 1.696931  | -0.178065 |
| 1 | 4.189862  | 1.765853  | -0.424573 |
| 1 | 2.971843  | 2.267429  | 0.735285  |
| 1 | 2.578918  | 2.188763  | -0.973857 |
| 6 | -2.674914 | 1.400559  | 1.584180  |
| 1 | -3.142764 | 0.732061  | 2.281379  |
| 1 | -2.805176 | 2.450054  | 1.775575  |

---

**(10) Tran-Pro-C**

---

| Atomic<br>Number | Coordinates (Angstroms) |           |           |
|------------------|-------------------------|-----------|-----------|
|                  | X                       | Y         | Z         |
| 1                | 1.955374                | 2.397028  | -1.071919 |
| 6                | 1.250075                | 1.853284  | -0.455715 |
| 1                | 0.625027                | 2.573914  | 0.057978  |
| 6                | 1.973453                | 0.969257  | 0.559364  |
| 6                | 0.396119                | 0.867619  | -1.304477 |
| 6                | 0.273325                | -0.400419 | -0.421732 |
| 6                | 1.696527                | -0.481046 | 0.185300  |
| 6                | -0.828211               | -0.272148 | 0.656745  |
| 1                | -0.597492               | 0.569113  | 1.310303  |
| 1                | -0.801617               | -1.158538 | 1.289026  |
| 6                | 1.889046                | -1.506713 | 1.296527  |
| 1                | 2.918781                | -1.530565 | 1.631604  |
| 1                | 1.635072                | -2.491252 | 0.921602  |
| 1                | 1.266010                | -1.275922 | 2.147843  |
| 8                | 2.497702                | -0.830474 | -0.978535 |
| 6                | 3.927914                | -0.823607 | -0.855941 |
| 1                | 4.284269                | -1.637260 | -0.235976 |
| 1                | 4.291472                | 0.112053  | -0.451451 |
| 1                | 4.312947                | -0.954415 | -1.856680 |
| 6                | 2.673794                | 1.399439  | 1.586069  |
| 1                | 3.140591                | 0.730526  | 2.283565  |
| 1                | 2.803998                | 2.448815  | 1.778131  |

|    |           |           |           |
|----|-----------|-----------|-----------|
| 1  | -0.562876 | 1.286196  | -1.570121 |
| 1  | 0.931165  | 0.607906  | -2.204167 |
| 14 | -2.625095 | -0.110739 | 0.055419  |
| 6  | -3.740704 | -0.854134 | 1.390213  |
| 1  | -3.600476 | -0.353754 | 2.346787  |
| 1  | -3.530491 | -1.911706 | 1.538059  |
| 1  | -4.791430 | -0.761474 | 1.122479  |
| 6  | -2.886362 | -1.054345 | -1.559997 |
| 1  | -2.296246 | -0.638805 | -2.373425 |
| 1  | -3.931858 | -1.019921 | -1.860817 |
| 1  | -2.609991 | -2.101756 | -1.454775 |
| 6  | -3.132251 | 1.696894  | -0.177587 |
| 1  | -2.972168 | 2.267401  | 0.735700  |
| 1  | -4.190598 | 1.765588  | -0.423628 |
| 1  | -2.580010 | 2.188908  | -0.973610 |
| 1  | 0.113907  | -1.282427 | -1.026712 |

(11) 1-Si

| Atomic<br>Number | Coordinates (Angstroms) |           |           |
|------------------|-------------------------|-----------|-----------|
|                  | X                       | Y         | Z         |
| 6                | 0.000000                | 0.000000  | 0.000000  |
| 14               | 0.000000                | 0.000000  | 1.897399  |
| 6                | 1.897397                | 0.000000  | 1.955939  |
| 6                | 2.421500                | 0.229613  | 0.540110  |
| 6                | 1.409692                | -0.347458 | -0.468719 |
| 1                | 3.409779                | -0.199339 | 0.400756  |
| 1                | 2.512681                | 1.301078  | 0.368331  |
| 1                | 1.519577                | -1.430707 | -0.494360 |
| 1                | 1.602237                | 0.013852  | -1.474926 |
| 6                | -1.006753               | 0.287758  | -0.842983 |
| 1                | -1.995574               | 0.531032  | -0.491460 |
| 1                | -0.878134               | 0.294027  | -1.914431 |
| 6                | 2.707277                | -0.182204 | 3.013867  |
| 1                | 3.782685                | -0.180833 | 2.923246  |
| 1                | 2.324972                | -0.330674 | 4.009863  |
| 14               | -0.987378               | -1.992867 | 2.799390  |
| 6                | -0.183447               | -3.516323 | 2.002157  |
| 1                | -0.610156               | -4.435901 | 2.396285  |
| 1                | 0.886774                | -3.544567 | 2.189473  |
| 1                | -0.328884               | -3.524569 | 0.924914  |
| 6                | -2.850892               | -2.005090 | 2.424371  |
| 1                | -3.355915               | -1.151549 | 2.870273  |

|   |           |           |          |
|---|-----------|-----------|----------|
| 1 | -3.323698 | -2.902716 | 2.816625 |
| 1 | -3.042202 | -1.977226 | 1.354659 |
| 6 | -0.744759 | -2.074025 | 4.683116 |
| 1 | -1.181536 | -1.211556 | 5.180759 |
| 1 | 0.308350  | -2.108807 | 4.950544 |
| 1 | -1.214489 | -2.961772 | 5.100593 |
| 6 | -0.769918 | 1.570495  | 2.633273 |
| 1 | -0.627805 | 1.613648  | 3.710219 |
| 1 | -1.839700 | 1.615517  | 2.443689 |
| 1 | -0.320956 | 2.461588  | 2.204336 |

---

CASSCF(6,6)/6-311G(d) = -968.2299447955

MP2(6,6)/6-311++G(3df,3pd)//CASSCF(6,6)/6-311G(d) = -970.6065768

**(12) FC-Si**

CASSCF(6,6)/6-311G(d) = -967.9332495

MP2(6,6)/6-311++G(3df,3pd)//CASSCF(6,6)/6-311G(d) = -970.3083353

**(13) S1/S0-CI-Si**

---

| Atomic<br>Number | Coordinates (Angstroms) |           |           |
|------------------|-------------------------|-----------|-----------|
|                  | X                       | Y         | Z         |
| 6                | 0.076788                | 0.147472  | 0.403990  |
| 14               | 0.272636                | -0.430792 | 2.164534  |
| 6                | 2.152864                | -0.499704 | 2.001339  |
| 6                | 2.521379                | 0.511271  | 0.921638  |
| 6                | 1.438694                | 0.495583  | -0.180097 |
| 1                | 3.503585                | 0.316243  | 0.501368  |
| 1                | 2.561032                | 1.502316  | 1.368613  |
| 1                | 1.674519                | -0.290675 | -0.896389 |
| 1                | 1.425041                | 1.427877  | -0.739977 |
| 6                | 3.060940                | -1.253784 | 2.643351  |
| 1                | 4.115484                | -1.198222 | 2.421352  |
| 1                | 2.780495                | -1.952831 | 3.413087  |
| 6                | -0.572795               | -2.081388 | 2.588342  |
| 1                | -1.646248               | -2.016970 | 2.433756  |
| 1                | -0.413322               | -2.345515 | 3.629845  |
| 1                | -0.191171               | -2.892842 | 1.974837  |
| 14               | -1.431959               | 2.415423  | 1.561840  |
| 6                | -1.100835               | 0.512300  | -0.252338 |
| 1                | -1.079657               | 0.964151  | -1.230567 |
| 6                | -0.050513               | 3.481301  | 2.293486  |
| 1                | 0.762030                | 3.619369  | 1.586116  |
| 1                | 0.361168                | 3.039589  | 3.193326  |
| 1                | -0.436367               | 4.469813  | 2.540150  |
| 6                | -2.760861               | 1.959446  | 2.830747  |
| 1                | -3.451450               | 1.217823  | 2.439754  |
| 1                | -3.344260               | 2.842953  | 3.087165  |
| 1                | -2.324924               | 1.563367  | 3.740439  |

|   |           |          |           |
|---|-----------|----------|-----------|
| 6 | -2.249611 | 3.412177 | 0.170376  |
| 1 | -3.066817 | 2.868721 | -0.293798 |
| 1 | -1.540623 | 3.675373 | -0.608963 |
| 1 | -2.655494 | 4.340339 | 0.570860  |
| 1 | -2.042984 | 0.073530 | 0.036712  |

---

Derivative Coupling

|     |               |               |               |
|-----|---------------|---------------|---------------|
| -1  | 0.0176133953  | -0.0178053768 | 0.0135468373  |
| -2  | 0.0110466846  | -0.0176295083 | -0.0203857882 |
| -3  | 0.0011913321  | 0.0024552305  | 0.0027173984  |
| -4  | -0.0011232288 | -0.0001372821 | -0.0013083364 |
| -5  | -0.0006806164 | -0.0026481997 | -0.0008155374 |
| -6  | 0.0000266563  | -0.0001190269 | 0.0005187534  |
| -7  | -0.0001293377 | 0.0002100630  | 0.0002602445  |
| -8  | 0.0018986752  | 0.0010884988  | -0.0007689219 |
| -9  | 0.0002938233  | 0.0009722059  | 0.0006049574  |
| -10 | -0.0006765342 | -0.0004050139 | 0.0009128673  |
| -11 | -0.0003836635 | -0.0002911824 | -0.0004380095 |
| -12 | 0.0001232774  | 0.0000750480  | 0.0001506692  |
| -13 | -0.0027451486 | 0.0033213014  | 0.0054669344  |
| -14 | -0.0000099679 | -0.0003804479 | -0.0000745322 |
| -15 | -0.0003634518 | -0.0007299630 | -0.0000210188 |
| -16 | 0.0009663297  | 0.0023184402  | -0.0006529491 |
| -17 | -0.0186141060 | 0.0118856758  | -0.0233345819 |
| -18 | -0.0058673311 | 0.0059084532  | 0.0109200427  |
| -19 | -0.0003656477 | 0.0006698326  | 0.0005166052  |
| -20 | 0.0008933921  | -0.0016234835 | 0.0016473899  |
| -21 | -0.0000919074 | -0.0001766343 | -0.0002091815 |
| -22 | 0.0016565321  | 0.0012394403  | 0.0016654380  |
| -23 | 0.0004047826  | -0.0012553471 | 0.0009625110  |
| -24 | 0.0002080310  | 0.0025557767  | 0.0028394552  |
| -25 | 0.0003109874  | -0.0000180432 | -0.0006099974 |
| -26 | 0.0001898768  | -0.0011107760 | 0.0018692444  |
| -27 | -0.0011935875 | -0.0004437515 | 0.0023317611  |
| -28 | -0.0040417343 | 0.0102229304  | 0.0063710228  |
| -29 | -0.0000692368 | -0.0006994254 | 0.0002890732  |
| -30 | 0.0006072215  | -0.0002930458 | 0.0001217550  |
| -31 | -0.0019296334 | 0.0021389295  | -0.0035780295 |
| -32 | 0.0008541357  | 0.0007046815  | -0.0015160766 |

Unscaled Gradient Difference

|    |               |              |               |
|----|---------------|--------------|---------------|
| -1 | -0.0669283148 | 0.0338201114 | -0.0916714886 |
| -2 | -0.0161671113 | 0.0000443063 | 0.0170536382  |



|     |               |               |               |
|-----|---------------|---------------|---------------|
| -3  | -0.0038679434 | 0.0104877494  | 0.0026674977  |
| -4  | 0.0007275717  | 0.0028559897  | -0.0014190376 |
| -5  | 0.0053984498  | -0.0098278397 | -0.0080381179 |
| -6  | 0.0002032433  | -0.0000116537 | 0.0005989876  |
| -7  | 0.0006172094  | -0.0003253457 | 0.0007417154  |
| -8  | 0.0043990503  | 0.0017609967  | 0.0001444795  |
| -9  | -0.0010842644 | -0.0017909305 | 0.0015229570  |
| -10 | -0.0011361928 | -0.0021131899 | 0.0027647967  |
| -11 | -0.0009358206 | -0.0008712145 | -0.0014843798 |
| -12 | 0.0002502387  | 0.0007071730  | 0.0004829409  |
| -13 | 0.0017226452  | 0.0036553463  | 0.0023033978  |
| -14 | 0.0006743610  | 0.0008134139  | -0.0002773468 |
| -15 | 0.0001568696  | -0.0008565798 | 0.0001441636  |
| -16 | 0.0008820168  | 0.0000082331  | -0.0015356312 |
| -17 | 0.0182059029  | -0.0004661881 | 0.0876435212  |
| -18 | 0.0764507496  | -0.0803175571 | -0.0157045576 |
| -19 | 0.0006180989  | -0.0005788582 | -0.0013027257 |
| -20 | -0.0110723697 | 0.0221680271  | 0.0020227381  |
| -21 | 0.0008645269  | -0.0000411877 | -0.0006106795 |
| -22 | -0.0016226134 | -0.0018541098 | -0.0000940082 |
| -23 | 0.0069228056  | 0.0053473720  | 0.0023792937  |
| -24 | -0.0137889414 | 0.0233440606  | 0.0014603727  |
| -25 | -0.0000869233 | -0.0009176513 | -0.0003959045 |
| -26 | -0.0077019314 | -0.0022267163 | 0.0053063367  |
| -27 | 0.0028551419  | 0.0001679913  | -0.0015633723 |
| -28 | 0.0056427029  | -0.0155137139 | -0.0127667447 |
| -29 | -0.0012537652 | 0.0014678505  | -0.0016834157 |
| -30 | -0.0009710572 | 0.0014223515  | -0.0016605853 |
| -31 | 0.0030039152  | -0.0043669645 | 0.0044665583  |
| -32 | -0.0029782509 | 0.0140087280  | 0.0085046005  |

-----

CASSCF(6,6)/6-311G(d) = -968.0703069636

MP2(6,6)/6-311++G(3df,3pd)//CASSCF(6,6)/6-311G(d) = -970.468129

#### (14) Int-Si

| Atomic<br>Number | Coordinates (Angstroms) |           |           |
|------------------|-------------------------|-----------|-----------|
|                  | X                       | Y         | Z         |
| 6                | 0.000000                | 0.000000  | 0.000000  |
| 14               | 0.000000                | 0.000000  | 1.736310  |
| 6                | 1.872722                | 0.000000  | 1.998197  |
| 6                | 2.410207                | 0.354840  | 0.613797  |
| 6                | 1.449979                | -0.163282 | -0.470888 |
| 1                | 3.426037                | -0.004800 | 0.459114  |
| 1                | 2.431027                | 1.438477  | 0.531775  |
| 1                | 1.671010                | -1.210435 | -0.659611 |
| 1                | 1.618044                | 0.362957  | -1.409676 |
| 6                | 2.628767                | -0.249918 | 3.079691  |
| 1                | 3.707580                | -0.227169 | 3.040350  |

|    |           |           |           |
|----|-----------|-----------|-----------|
| 1  | 2.196349  | -0.478282 | 4.038724  |
| 6  | -1.371038 | 0.137286  | 3.021821  |
| 1  | -1.478832 | -0.782377 | 3.586743  |
| 1  | -2.320371 | 0.356961  | 2.544842  |
| 1  | -1.159296 | 0.937485  | 3.724721  |
| 6  | -1.112728 | 0.028288  | -1.017110 |
| 1  | -0.829289 | 0.645181  | -1.873127 |
| 1  | -1.991655 | 0.508460  | -0.593190 |
| 14 | -1.713296 | -1.659234 | -1.665667 |
| 6  | -2.191211 | -2.776970 | -0.225834 |
| 1  | -2.888904 | -2.288501 | 0.445461  |
| 1  | -1.332312 | -3.078332 | 0.365155  |
| 1  | -2.673054 | -3.683359 | -0.588015 |
| 6  | -0.427175 | -2.530419 | -2.736167 |
| 1  | -0.122360 | -1.913124 | -3.576203 |
| 1  | -0.847358 | -3.446634 | -3.142568 |
| 1  | 0.467733  | -2.804929 | -2.185024 |
| 6  | -3.250478 | -1.350333 | -2.721360 |
| 1  | -3.015528 | -0.776088 | -3.612223 |
| 1  | -4.007500 | -0.800846 | -2.173641 |
| 1  | -3.703591 | -2.284239 | -3.051941 |

-----  
 CASSCF(6,6, + 6,4)/6-311G(d) = -968.1881512

MP2(6,6, + 6,4)/6-311++G(3df,3pd)//CASSCF(6,6, + 6,4)/6-311G(d)= -970.5804374

### (15) CH<sub>3</sub>OH

| Atomic<br>Number | Coordinates (Angstroms) |           |          |
|------------------|-------------------------|-----------|----------|
|                  | X                       | Y         | Z        |
| 8                | 0.000000                | 0.000000  | 2.000000 |
| 6                | 1.385642                | 0.000000  | 2.210512 |
| 1                | -0.455560               | 0.000000  | 2.826900 |
| 1                | 1.647942                | 0.000000  | 3.287333 |
| 1                | 1.827084                | 0.881563  | 1.759173 |
| 1                | 1.827084                | -0.881563 | 1.759173 |

-----  
 CASSCF(6,4)/6-311G(d) = -115.0498058

MP2(6,4)/6-311++G(3df,3pd)//CASSCF(6,4)/6-311G(d)= -115.4382962

### (16) Cpx-Si

| Atomic<br>Number | Coordinates (Angstroms) |          |           |
|------------------|-------------------------|----------|-----------|
|                  | X                       | Y        | Z         |
| 6                | -2.346161               | 1.426175 | 0.365269  |
| 6                | -1.263647               | 2.421272 | -0.043610 |
| 6                | -0.124695               | 1.728366 | -0.821247 |

|    |           |           |           |
|----|-----------|-----------|-----------|
| 6  | 0.087428  | 0.299219  | -0.290710 |
| 14 | -1.446940 | -0.252720 | 0.377141  |
| 1  | -0.836115 | 2.832308  | 0.867006  |
| 1  | -1.684635 | 3.250124  | -0.604432 |
| 1  | -0.355536 | 1.731204  | -1.889632 |
| 1  | 0.780045  | 2.317389  | -0.718389 |
| 6  | -1.748037 | -1.515276 | 1.751178  |
| 1  | -2.799854 | -1.644406 | 1.994793  |
| 1  | -1.337548 | -2.495570 | 1.523301  |
| 1  | -1.253818 | -1.150026 | 2.645780  |
| 6  | -3.638184 | 1.719827  | 0.506322  |
| 1  | -4.016255 | 2.716194  | 0.350861  |
| 1  | -4.362475 | 0.986365  | 0.815675  |
| 6  | 1.274855  | -0.484554 | -0.831838 |
| 1  | 1.091938  | -1.551338 | -0.716757 |
| 1  | 1.384181  | -0.331298 | -1.910267 |
| 14 | 2.960932  | -0.208891 | -0.010573 |
| 6  | 3.553963  | 1.591470  | -0.058949 |
| 1  | 2.954670  | 2.239101  | 0.573382  |
| 1  | 4.582387  | 1.658436  | 0.290589  |
| 1  | 3.530125  | 1.991329  | -1.071399 |
| 6  | 2.896805  | -0.802478 | 1.787345  |
| 1  | 2.698305  | -1.871265 | 1.840282  |
| 1  | 3.835733  | -0.614092 | 2.302508  |
| 1  | 2.107350  | -0.296602 | 2.332939  |
| 6  | 4.233920  | -1.246421 | -0.967574 |
| 1  | 4.312980  | -0.920476 | -2.004926 |
| 1  | 5.224768  | -1.169570 | -0.526776 |
| 1  | 3.963640  | -2.301321 | -0.980382 |
| 8  | -2.599462 | -1.280440 | -1.030670 |
| 1  | -2.130931 | -1.387209 | -1.851163 |
| 6  | -3.858945 | -1.956455 | -0.955464 |
| 1  | -4.649064 | -1.222539 | -0.978273 |
| 1  | -3.882903 | -2.507580 | -0.028377 |
| 1  | -3.960981 | -2.639958 | -1.787273 |

-----  
CASSCF(12,10)/6-311G(d) = -1083.2615991

MP2(12,10)/6-311++G(3df,3pd)//CASSCF(12,10)/6-311G(d)= -1086.04556391

**(17) Cis-TS-Si**

| Atomic<br>Number | Coordinates (Angstroms) |           |           |
|------------------|-------------------------|-----------|-----------|
|                  | X                       | Y         | Z         |
| 6                | 0.000000                | 0.000000  | 0.000000  |
| 6                | 0.000000                | 0.000000  | 1.568724  |
| 6                | 1.509202                | 0.000000  | 2.102467  |
| 6                | 2.228545                | -1.106759 | 1.288111  |
| 14               | 1.718978                | -0.572130 | -0.482184 |
| 1                | -0.481022               | -0.896676 | 1.909791  |

|    |           |           |           |
|----|-----------|-----------|-----------|
| 1  | -0.530553 | 0.847823  | 1.958066  |
| 1  | 1.980774  | 0.939617  | 1.887250  |
| 1  | 1.529728  | -0.159886 | 3.156263  |
| 6  | 1.943298  | -1.856123 | -1.908176 |
| 1  | 1.545179  | -1.463025 | -2.824442 |
| 1  | 2.987238  | -2.069425 | -2.036972 |
| 1  | 1.423220  | -2.757888 | -1.648614 |
| 6  | -1.033600 | 0.315029  | -0.813773 |
| 1  | -1.979396 | 0.605715  | -0.401921 |
| 1  | -0.916057 | 0.275098  | -1.877748 |
| 6  | 3.688461  | -1.553944 | 1.500693  |
| 1  | 3.943969  | -2.275303 | 0.746234  |
| 1  | 4.357007  | -0.717230 | 1.405026  |
| 14 | 4.048662  | -2.416990 | 3.208164  |
| 6  | 3.754358  | -1.257448 | 4.731470  |
| 1  | 2.732612  | -0.948949 | 4.771173  |
| 1  | 4.002967  | -1.785663 | 5.632673  |
| 1  | 4.381947  | -0.390813 | 4.645981  |
| 6  | 2.896433  | -3.963371 | 3.359599  |
| 1  | 3.098303  | -4.641578 | 2.552357  |
| 1  | 3.078308  | -4.460082 | 4.293838  |
| 1  | 1.869442  | -3.654562 | 3.315712  |
| 6  | 5.892275  | -3.004018 | 3.212870  |
| 1  | 6.538788  | -2.156360 | 3.086949  |
| 1  | 6.116921  | -3.486859 | 4.145046  |
| 1  | 6.053469  | -3.695890 | 2.408035  |
| 8  | 2.868986  | 0.750439  | -0.089627 |
| 1  | 3.529112  | 0.795999  | 1.432791  |
| 6  | 3.136773  | 1.560168  | -1.245448 |
| 1  | 2.425641  | 2.363277  | -1.286712 |
| 1  | 3.064776  | 0.975715  | -2.143061 |
| 1  | 4.129756  | 1.961601  | -1.180146 |

---

|     |       |       |       |
|-----|-------|-------|-------|
| -1  | 0.00  | -0.03 | 0.01  |
| -2  | -0.02 | -0.04 | 0.00  |
| -3  | -0.04 | 0.01  | 0.04  |
| -4  | 0.05  | 0.09  | 0.00  |
| -5  | 0.06  | 0.03  | 0.05  |
| -6  | -0.03 | -0.04 | -0.02 |
| -7  | -0.10 | -0.05 | -0.12 |
| -8  | -0.13 | 0.02  | -0.05 |
| -9  | -0.11 | 0.06  | 0.03  |
| -10 | -0.02 | -0.03 | 0.02  |
| -11 | -0.08 | 0.12  | 0.11  |
| -12 | -0.08 | -0.18 | -0.15 |
| -13 | -0.15 | -0.01 | -0.14 |
| -14 | 0.02  | 0.01  | 0.00  |
| -15 | -0.10 | -0.21 | -0.09 |
| -16 | -0.03 | -0.17 | -0.02 |
| -17 | 0.02  | -0.07 | 0.03  |
| -18 | -0.19 | -0.20 | 0.08  |
| -19 | 0.11  | -0.22 | -0.17 |

|     |       |       |       |
|-----|-------|-------|-------|
| -20 | 0.02  | 0.03  | 0.02  |
| -21 | -0.03 | 0.00  | 0.00  |
| -22 | -0.08 | -0.05 | -0.04 |
| -23 | -0.10 | -0.01 | 0.01  |
| -24 | -0.10 | 0.04  | -0.03 |
| -25 | 0.00  | -0.01 | -0.01 |
| -26 | -0.04 | 0.09  | -0.12 |
| -27 | 0.01  | -0.18 | -0.13 |
| -28 | -0.04 | -0.10 | 0.03  |
| -29 | -0.01 | -0.03 | -0.03 |
| -30 | 0.03  | -0.09 | -0.10 |
| -31 | -0.06 | -0.09 | -0.05 |
| -32 | -0.13 | -0.08 | -0.04 |
| -33 | 0.01  | 0.09  | 0.00  |
| -34 | -0.15 | -0.20 | 0.03  |
| -35 | -0.02 | 0.00  | -0.07 |
| -36 | 0.07  | 0.07  | -0.05 |
| -37 | -0.26 | -0.05 | -0.04 |
| -38 | 0.07  | -0.19 | -0.28 |

---

CASSCF(12,10)/6-311G(d) = -1083.22079531

MP2(12,10)/6-311++G(3df,3pd)//CASSCF(12,10)/6-311G(d) = -1086.002001

### (17) Cis-Pro-Si

---

| Atomic<br>Number | Coordinates (Angstroms) |           |           |
|------------------|-------------------------|-----------|-----------|
|                  | X                       | Y         | Z         |
| 6                | 0.000000                | 0.000000  | 0.000000  |
| 6                | 0.000000                | 0.000000  | 1.522174  |
| 6                | 1.439362                | 0.000000  | 2.045770  |
| 6                | 2.336073                | -0.974698 | 1.243419  |
| 14               | 1.562972                | -0.926576 | -0.501741 |
| 1                | -0.487312               | -0.914157 | 1.856669  |
| 1                | -0.584294               | 0.819872  | 1.930671  |
| 1                | 1.844715                | 0.999331  | 1.904770  |
| 1                | 1.482182                | -0.190650 | 3.111197  |
| 6                | 1.154001                | -2.549280 | -1.346757 |
| 1                | 0.752561                | -2.407346 | -2.345625 |
| 1                | 2.047744                | -3.162631 | -1.447640 |
| 1                | 0.424878                | -3.119225 | -0.787933 |
| 6                | -0.995812               | 0.489885  | -0.743459 |
| 1                | -1.849831               | 0.992393  | -0.315077 |
| 1                | -0.997675               | 0.401184  | -1.816366 |
| 6                | 2.646389                | -2.315324 | 1.917724  |
| 1                | 3.214865                | -2.939122 | 1.228070  |
| 1                | 3.345803                | -2.120854 | 2.737053  |
| 14               | 1.376427                | -3.428454 | 2.771622  |
| 6                | 0.723938                | -2.614294 | 4.339005  |
| 1                | 0.119634                | -1.730433 | 4.175476  |

|   |           |           |           |
|---|-----------|-----------|-----------|
| 1 | 0.109012  | -3.309842 | 4.905100  |
| 1 | 1.545578  | -2.325818 | 4.991723  |
| 6 | -0.067299 | -3.966057 | 1.685903  |
| 1 | 0.270609  | -4.487501 | 0.795771  |
| 1 | -0.715786 | -4.646857 | 2.235794  |
| 1 | -0.687875 | -3.138128 | 1.355967  |
| 6 | 2.334952  | -4.955444 | 3.329665  |
| 1 | 3.112279  | -4.684834 | 4.038782  |
| 1 | 1.687643  | -5.674236 | 3.827386  |
| 1 | 2.815709  | -5.470318 | 2.502132  |
| 8 | 2.662055  | -0.059231 | -1.420609 |
| 1 | 3.287127  | -0.470328 | 1.105146  |
| 6 | 2.513827  | 0.146811  | -2.834574 |
| 1 | 1.673541  | 0.797125  | -3.051019 |
| 1 | 2.387748  | -0.794047 | -3.358451 |
| 1 | 3.420876  | 0.621965  | -3.185097 |

---

CASSCF(12,10)/6-311G(d) = -1083.3527370011

MP2(12,10)/6-311++G(3df,3pd)//CASSCF(12,10)/6-311G(d) = -1086.09997

**(18) Trans-TS-Si**

---

| Atomic<br>Number | Coordinates (Angstroms) |           |           |
|------------------|-------------------------|-----------|-----------|
|                  | X                       | Y         | Z         |
| 6                | 0.000000                | 0.000000  | 0.000000  |
| 1                | 0.000000                | 0.000000  | 1.095031  |
| 6                | 1.450304                | 0.000000  | -0.549312 |
| 14               | 1.129338                | -0.596969 | -2.520689 |
| 6                | -0.562085               | -1.341310 | -2.027192 |
| 6                | -0.721626               | -1.258658 | -0.518293 |
| 1                | -0.559036               | 0.880188  | -0.334646 |
| 1                | -0.288332               | -2.154644 | -0.056003 |
| 1                | -1.780017               | -1.218903 | -0.236230 |
| 6                | -1.480063               | -1.825033 | -2.874861 |
| 1                | -2.421443               | -2.227704 | -2.500142 |
| 1                | -1.339263               | -1.883873 | -3.951121 |
| 6                | 2.368251                | -1.894952 | -2.971523 |
| 1                | 3.375980                | -1.473123 | -3.035689 |
| 1                | 2.132561                | -2.346858 | -3.939902 |
| 1                | 2.391538                | -2.696479 | -2.226633 |
| 8                | 0.915241                | 0.671837  | -3.603406 |
| 6                | 1.996930                | 1.219587  | -4.180105 |
| 1                | 1.657490                | 2.016124  | -4.851874 |
| 1                | 2.538446                | 0.489462  | -4.791732 |
| 1                | 2.671424                | 1.672394  | -3.447559 |
| 1                | 0.296684                | 1.336481  | -3.215291 |
| 6                | 2.348695                | 1.237751  | -0.380807 |
| 1                | 3.072718                | 1.281236  | -1.202071 |
| 1                | 2.963460                | 1.071692  | 0.512861  |
| 14               | 1.666478                | 2.994377  | -0.122805 |

|   |           |           |           |
|---|-----------|-----------|-----------|
| 6 | 0.760128  | 3.109981  | 1.510772  |
| 1 | 1.385822  | 2.737446  | 2.327298  |
| 1 | -0.165412 | 2.528621  | 1.496958  |
| 1 | 0.498600  | 4.149483  | 1.730972  |
| 6 | 3.131367  | 4.177181  | -0.092763 |
| 1 | 3.680744  | 4.131284  | -1.037671 |
| 1 | 3.817818  | 3.917441  | 0.718407  |
| 1 | 2.791373  | 5.205790  | 0.058999  |
| 6 | 0.528489  | 3.496936  | -1.523185 |
| 1 | 1.061036  | 3.497528  | -2.477602 |
| 1 | 0.149517  | 4.509889  | -1.354818 |
| 1 | -0.333225 | 2.829930  | -1.601739 |
| 1 | 2.096062  | -1.065987 | -0.114482 |
| 8 | 2.307053  | -1.201649 | 1.313658  |
| 6 | 3.037572  | -2.394061 | 1.562400  |
| 1 | 3.195860  | -2.497678 | 2.637956  |
| 1 | 4.000992  | -2.338204 | 1.050740  |
| 1 | 2.468225  | -3.248094 | 1.188701  |

---

|     |       |       |       |
|-----|-------|-------|-------|
| -1  | 0.00  | -0.03 | 0.01  |
| -2  | -0.02 | -0.04 | 0.00  |
| -3  | -0.04 | 0.01  | 0.04  |
| -4  | 0.05  | 0.09  | 0.00  |
| -5  | 0.06  | 0.03  | 0.05  |
| -6  | -0.03 | -0.04 | -0.02 |
| -7  | -0.10 | -0.05 | -0.12 |
| -8  | -0.13 | 0.02  | -0.05 |
| -9  | -0.11 | 0.06  | 0.03  |
| -10 | -0.02 | -0.03 | 0.02  |
| -11 | -0.08 | 0.12  | 0.11  |
| -12 | -0.08 | -0.18 | -0.15 |
| -13 | -0.15 | -0.01 | -0.14 |
| -14 | 0.02  | 0.01  | 0.00  |
| -15 | -0.10 | -0.21 | -0.09 |
| -16 | -0.03 | -0.17 | -0.02 |
| -17 | 0.02  | -0.07 | 0.03  |
| -18 | -0.19 | -0.20 | 0.08  |
| -19 | 0.11  | -0.22 | -0.17 |
| -20 | 0.02  | 0.03  | 0.02  |
| -21 | -0.03 | 0.00  | 0.00  |
| -22 | -0.08 | -0.05 | -0.04 |
| -23 | -0.10 | -0.01 | 0.01  |
| -24 | -0.10 | 0.04  | -0.03 |
| -25 | 0.00  | -0.01 | -0.01 |
| -26 | -0.04 | 0.09  | -0.12 |
| -27 | 0.01  | -0.18 | -0.13 |
| -28 | -0.04 | -0.10 | 0.03  |
| -29 | -0.01 | -0.03 | -0.03 |
| -30 | 0.03  | -0.09 | -0.10 |
| -31 | -0.06 | -0.09 | -0.05 |
| -32 | -0.13 | -0.08 | -0.04 |

|     |       |       |       |
|-----|-------|-------|-------|
| -33 | 0.01  | 0.09  | 0.00  |
| -34 | -0.15 | -0.20 | 0.03  |
| -35 | -0.02 | 0.00  | -0.07 |
| -36 | 0.07  | 0.07  | -0.05 |
| -37 | -0.26 | -0.05 | -0.04 |
| -38 | -0.26 | -0.05 | -0.04 |
| -39 | 0.07  | -0.19 | -0.28 |
| -40 | 0.03  | -0.09 | -0.10 |
| -41 | -0.06 | -0.09 | -0.05 |
| -42 | -0.13 | -0.08 | -0.04 |
| -43 | 0.01  | 0.09  | 0.00  |
| -44 | -0.01 | -0.03 | -0.03 |

-----

CASSCF(12,10)/6-311G(d) = - 1198.2819531

MP2(12,10)/6-311++G(3df,3pd)//CASSCF(12,10)/6-311G(d)= -1201.44739390

**(19) Trans-Pro-Si**

-----

| Atomic<br>Number | Coordinates (Angstroms) |           |           |
|------------------|-------------------------|-----------|-----------|
|                  | X                       | Y         | Z         |
| 6                | 0.000000                | 0.000000  | 0.000000  |
| 6                | 0.000000                | 0.000000  | 1.522174  |
| 6                | 1.439362                | 0.000000  | 2.045770  |
| 6                | 2.336073                | -0.974698 | 1.243419  |
| 14               | 1.562972                | -0.926576 | -0.501741 |
| 1                | -0.487312               | -0.914157 | 1.856669  |
| 1                | -0.584294               | 0.819872  | 1.930671  |
| 1                | 1.844715                | 0.999331  | 1.904770  |
| 1                | 1.482182                | -0.190650 | 3.111197  |
| 6                | 1.154001                | -2.549280 | -1.346757 |
| 1                | 0.752561                | -2.407346 | -2.345625 |
| 1                | 2.047744                | -3.162631 | -1.447640 |
| 1                | 0.424878                | -3.119225 | -0.787933 |
| 6                | -0.995812               | 0.489885  | -0.743459 |
| 1                | -1.849831               | 0.992393  | -0.315077 |
| 1                | -0.997675               | 0.401184  | -1.816366 |
| 6                | 2.646389                | -2.315324 | 1.917724  |
| 1                | 3.214865                | -2.939122 | 1.228070  |
| 1                | 3.345803                | -2.120854 | 2.737053  |
| 14               | 1.376427                | -3.428454 | 2.771622  |
| 6                | 0.723938                | -2.614294 | 4.339005  |
| 1                | 0.119634                | -1.730433 | 4.175476  |
| 1                | 0.109012                | -3.309842 | 4.905100  |
| 1                | 1.545578                | -2.325818 | 4.991723  |
| 6                | -0.067299               | -3.966057 | 1.685903  |
| 1                | 0.270609                | -4.487501 | 0.795771  |
| 1                | -0.715786               | -4.646857 | 2.235794  |
| 1                | -0.687875               | -3.138128 | 1.355967  |
| 6                | 2.334952                | -4.955444 | 3.329665  |



|   |          |           |           |
|---|----------|-----------|-----------|
| 1 | 3.112279 | -4.684834 | 4.038782  |
| 1 | 1.687643 | -5.674236 | 3.827386  |
| 1 | 2.815709 | -5.470318 | 2.502132  |
| 8 | 2.662055 | -0.059231 | -1.420609 |
| 1 | 3.287127 | -0.470328 | 1.105146  |
| 6 | 2.513827 | 0.146811  | -2.834574 |
| 1 | 1.673541 | 0.797125  | -3.051019 |
| 1 | 2.387748 | -0.794047 | -3.358451 |
| 1 | 3.420876 | 0.621965  | -3.185097 |

---

CASSCF(12,10)/6-311G(d) = -1083.34886314

MP2(12,10)/6-311++G(3df,3pd)//CASSCF(12,10)/6-311G(d) = -1086.0948997
